# Supplementary material
Source: PubMed Central journal article supplement (PMC2098853)

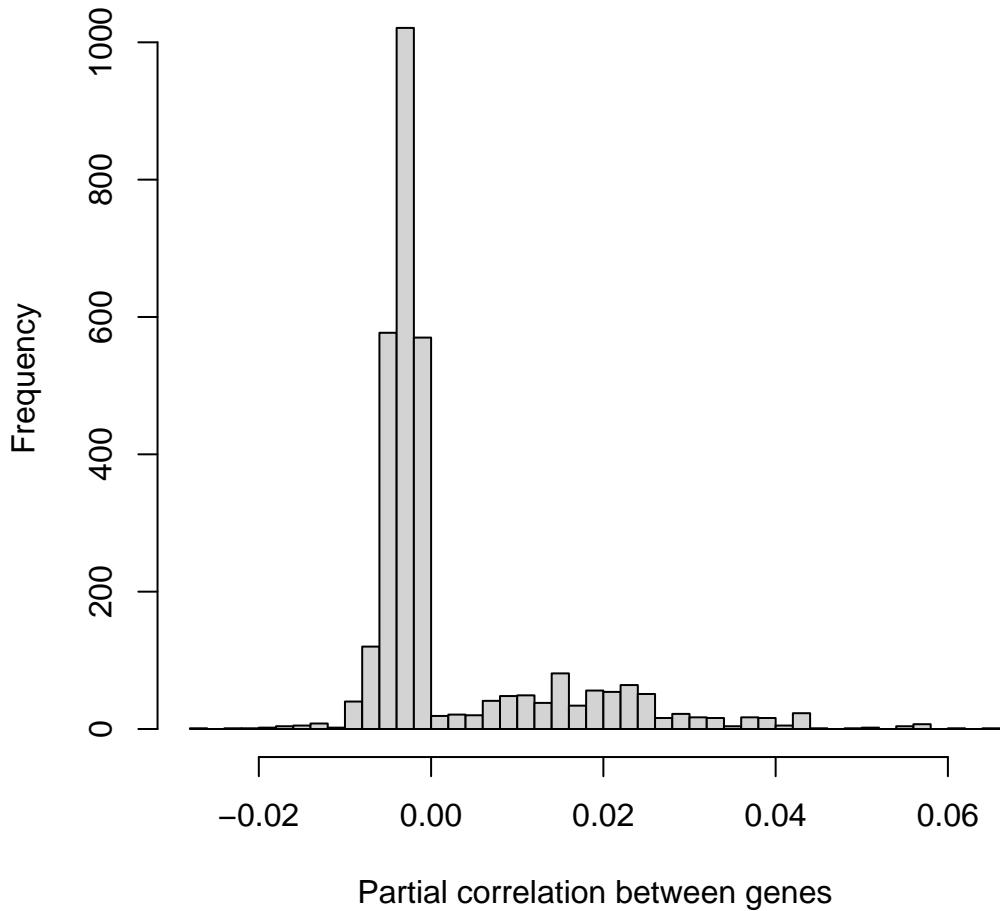

Supplement: pcbi.0030225.sg001.pdf [file pcbi.0030225.sg001.pdf]

$N = 10^5, u = 10^{-7}$

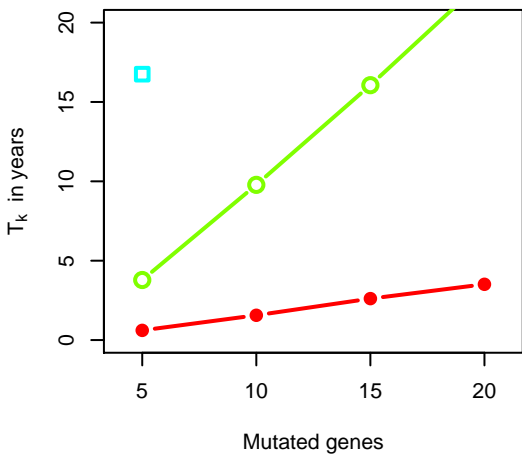

$N = 10^5, u = 10^{-5}$

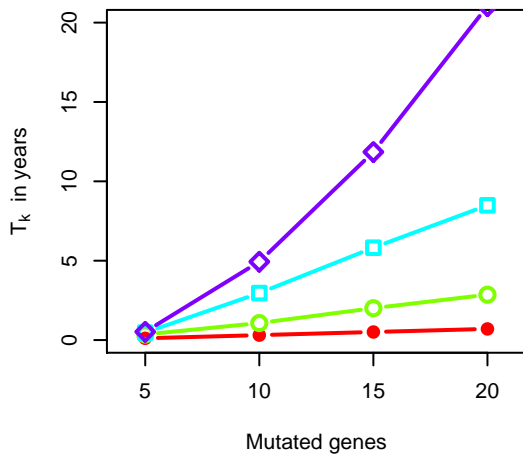

$N = 10^7, u = 10^{-7}$

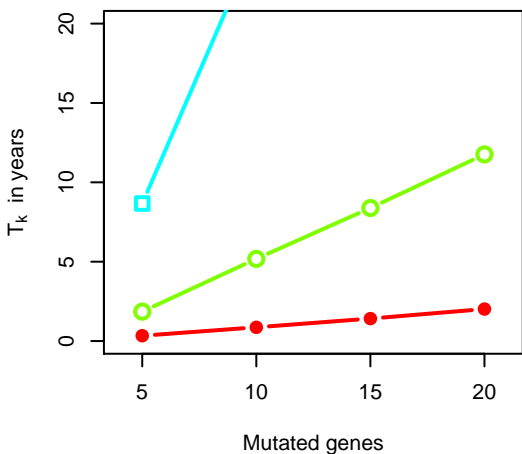

$N = 10^7, u = 10^{-5}$

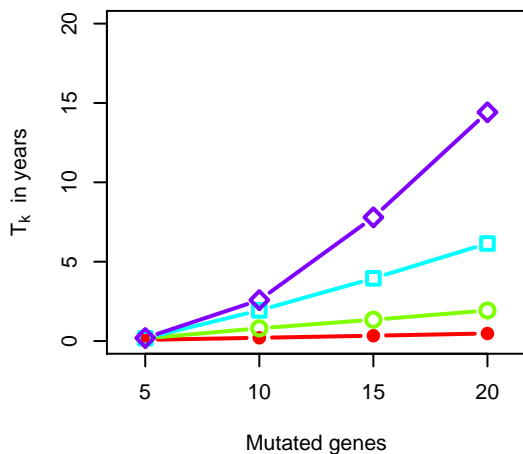

$N = 10^9, u = 10^{-7}$

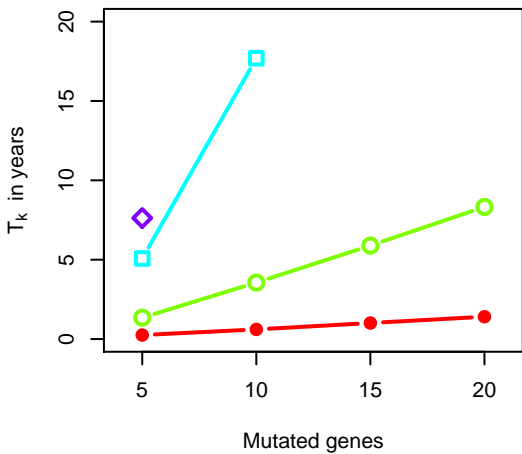

$N = 10^9, u = 10^{-5}$

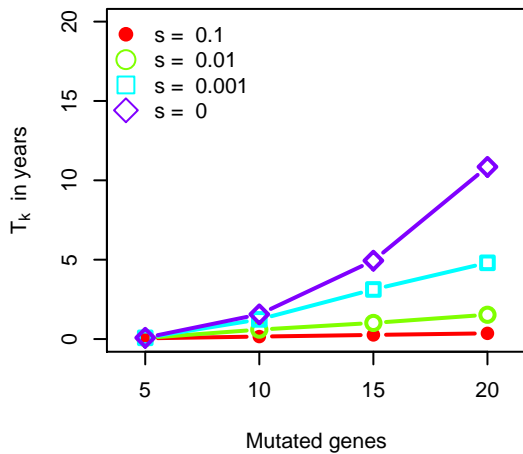

- $s = 0.1$
- $s = 0.01$
- $s = 0.001$
- $s = 0$

Supplement: pcbi.0030225.sg002.pdf [file pcbi.0030225.sg002.pdf]
